# Supplementary material for: Differential alternative splicing regulation among hepatocellular carcinoma with different risk factors
Source: PubMed Central journal article supplement (PMC6923823; doi:10.1186/s12920-019-0635-z), 2019-12-20
Supplement: 12920_2019_635_MOESM1_ESM.pdf [file 12920_2019_635_MOESM1_ESM.pdf]

## Supplementary Information

### Differential alternative splicing regulation among hepatocellular carcinoma with different risk factors

Young-Joo Jin<sup>1,2#</sup>, Seyoun Byun<sup>1#</sup>, Seonggyun Han<sup>1</sup>, John Chamberlin<sup>1</sup>, Dongwook Kim<sup>1</sup>, Min Jung Kim<sup>1,3</sup>, and Younghee Lee<sup>1,4\*</sup>

<sup>1</sup>*Department of Biomedical Informatics, University of Utah School of Medicine, Salt Lake City, Utah, USA;*

<sup>2</sup>*Division of Gastroenterology, Department of Internal Medicine, Inha University School of Medicine, Incheon, South Korea;*

<sup>3</sup>*Pharmacy program, Massachusetts College of Pharmacy and Health Sciences, Worcester Massachusetts*

<sup>4</sup>*Huntsman Cancer Institute, University of Utah School of Medicine, Salt Lake City, Utah, USA*

**#These two authors (Young-Joo Jin and Seyoun Byun) are co-first authors.**

Corresponding Authors: Younghee Lee, Ph.D.

Corresponding authors' address: Younghee Lee  
Department of Biomedical Informatics  
University of Utah School of Medicine  
Salt Lake City, Utah, USA

Corresponding authors' e-mail address: [younghee.lee@utah.edu](mailto:younghee.lee@utah.edu)

**Additional file 1 (.pdf):**

**Figure S1.** Count of alternative splicing events. (A) Gene set were selected with  $FDR < 0.05$  and  $PSI > 0.1$ .

(B) Gene set were selected with  $FDR < 0.05$  and  $PSI > 0.05$ .

**Figure S2.** Canonical pathways enriched in 143 alternatively spliced genes. Red line indicates the cutoff FDR value,  $q < 0.05$ .

**Figure S3.** GO terms enriched in 143 alternatively spliced genes. GO Cellular Component (CC), Biological Process (BP), and Molecular Function (MF) terms were considered significant at  $q < 0.05$  (red line). Potential false positive GO terms were filtered. GO, gene ontology.

**Figure S4.** PPI not affected by ethnic differences. Protein-protein interaction (PPI) network analysis was conducted for 198 genes ( $FDR < 0.05$ ,  $\Delta PSI > 0.05$ ) differentially associated with AS events in Caucasians and Asians. Of the 30 networked genes from the three etiology group comparisons (Figure 3), 15 genes (colored) were affected by ethnic differences and 15 genes (non-colored) were not affected by ethnicity.

**Figure S5.** Boxplots for distributions of gene expression among three etiologic groups for our three case studies.

**Figure S6.** Boxplots for distributions of gene expression among three etiologic groups. All of eight genes are reported to be affected by UPF3A via NMD process.

**Table S1.** Baseline clinical characteristics of study subjects.

**Table S2.** Identification of alternative splice events in the three pairwise comparisons of HBV vs. HCV, HCV vs. alcohol, and HBV vs. alcohol.

**Table S3.** The demographic summary of Caucasian and Asian population.

**Table S4.** Identification of alternative splice events in comparison of Caucasian and Asian population.

**Table S5.** List of frequently altered genes by etiology

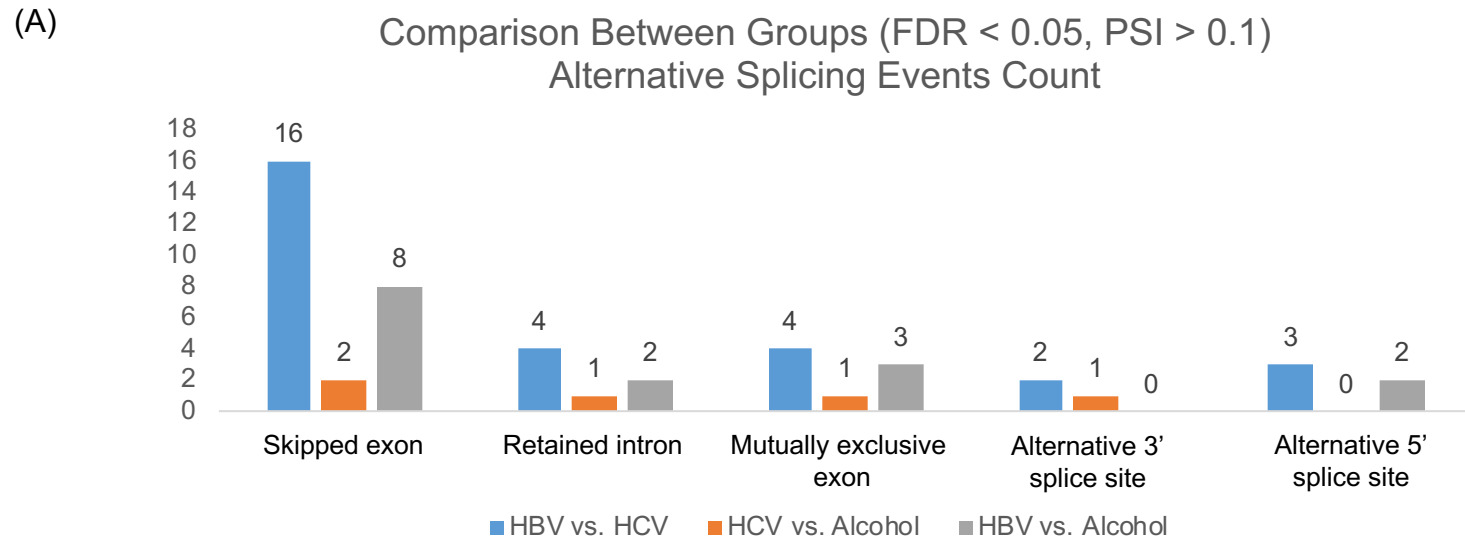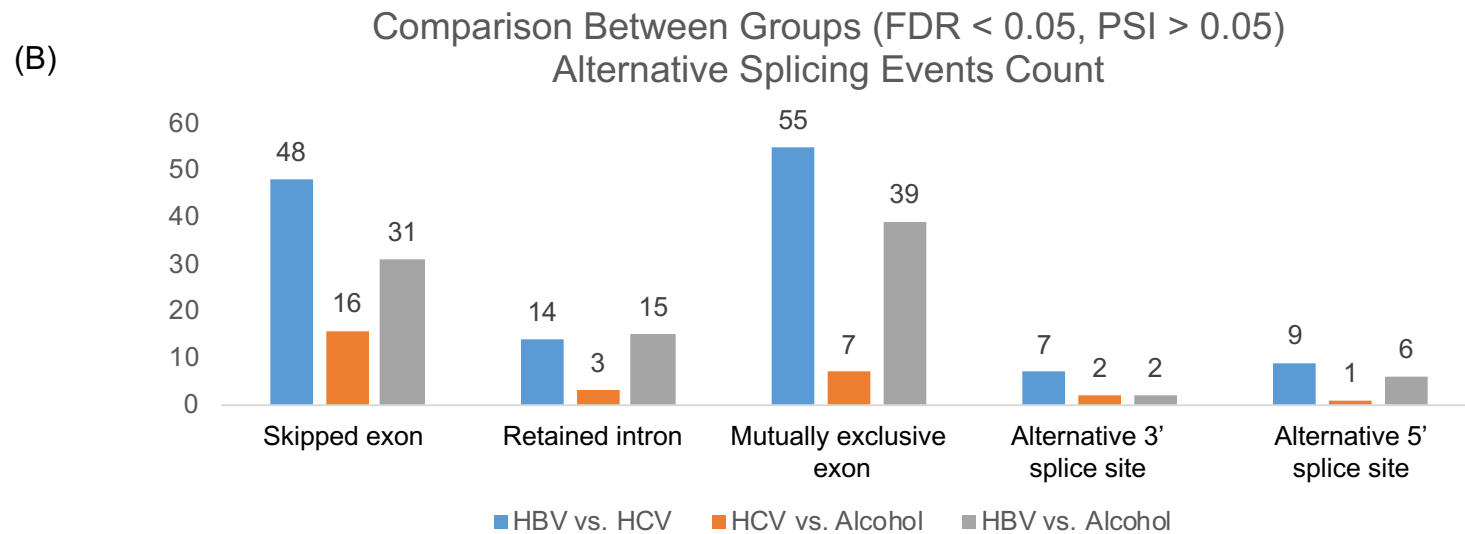

**Figure S1.** Count of alternative splicing events. (A) Gene set were selected with FDR < 0.05 and PSI > 0.1. (B) Gene set were selected with FDR < 0.05 and PSI > 0.05.

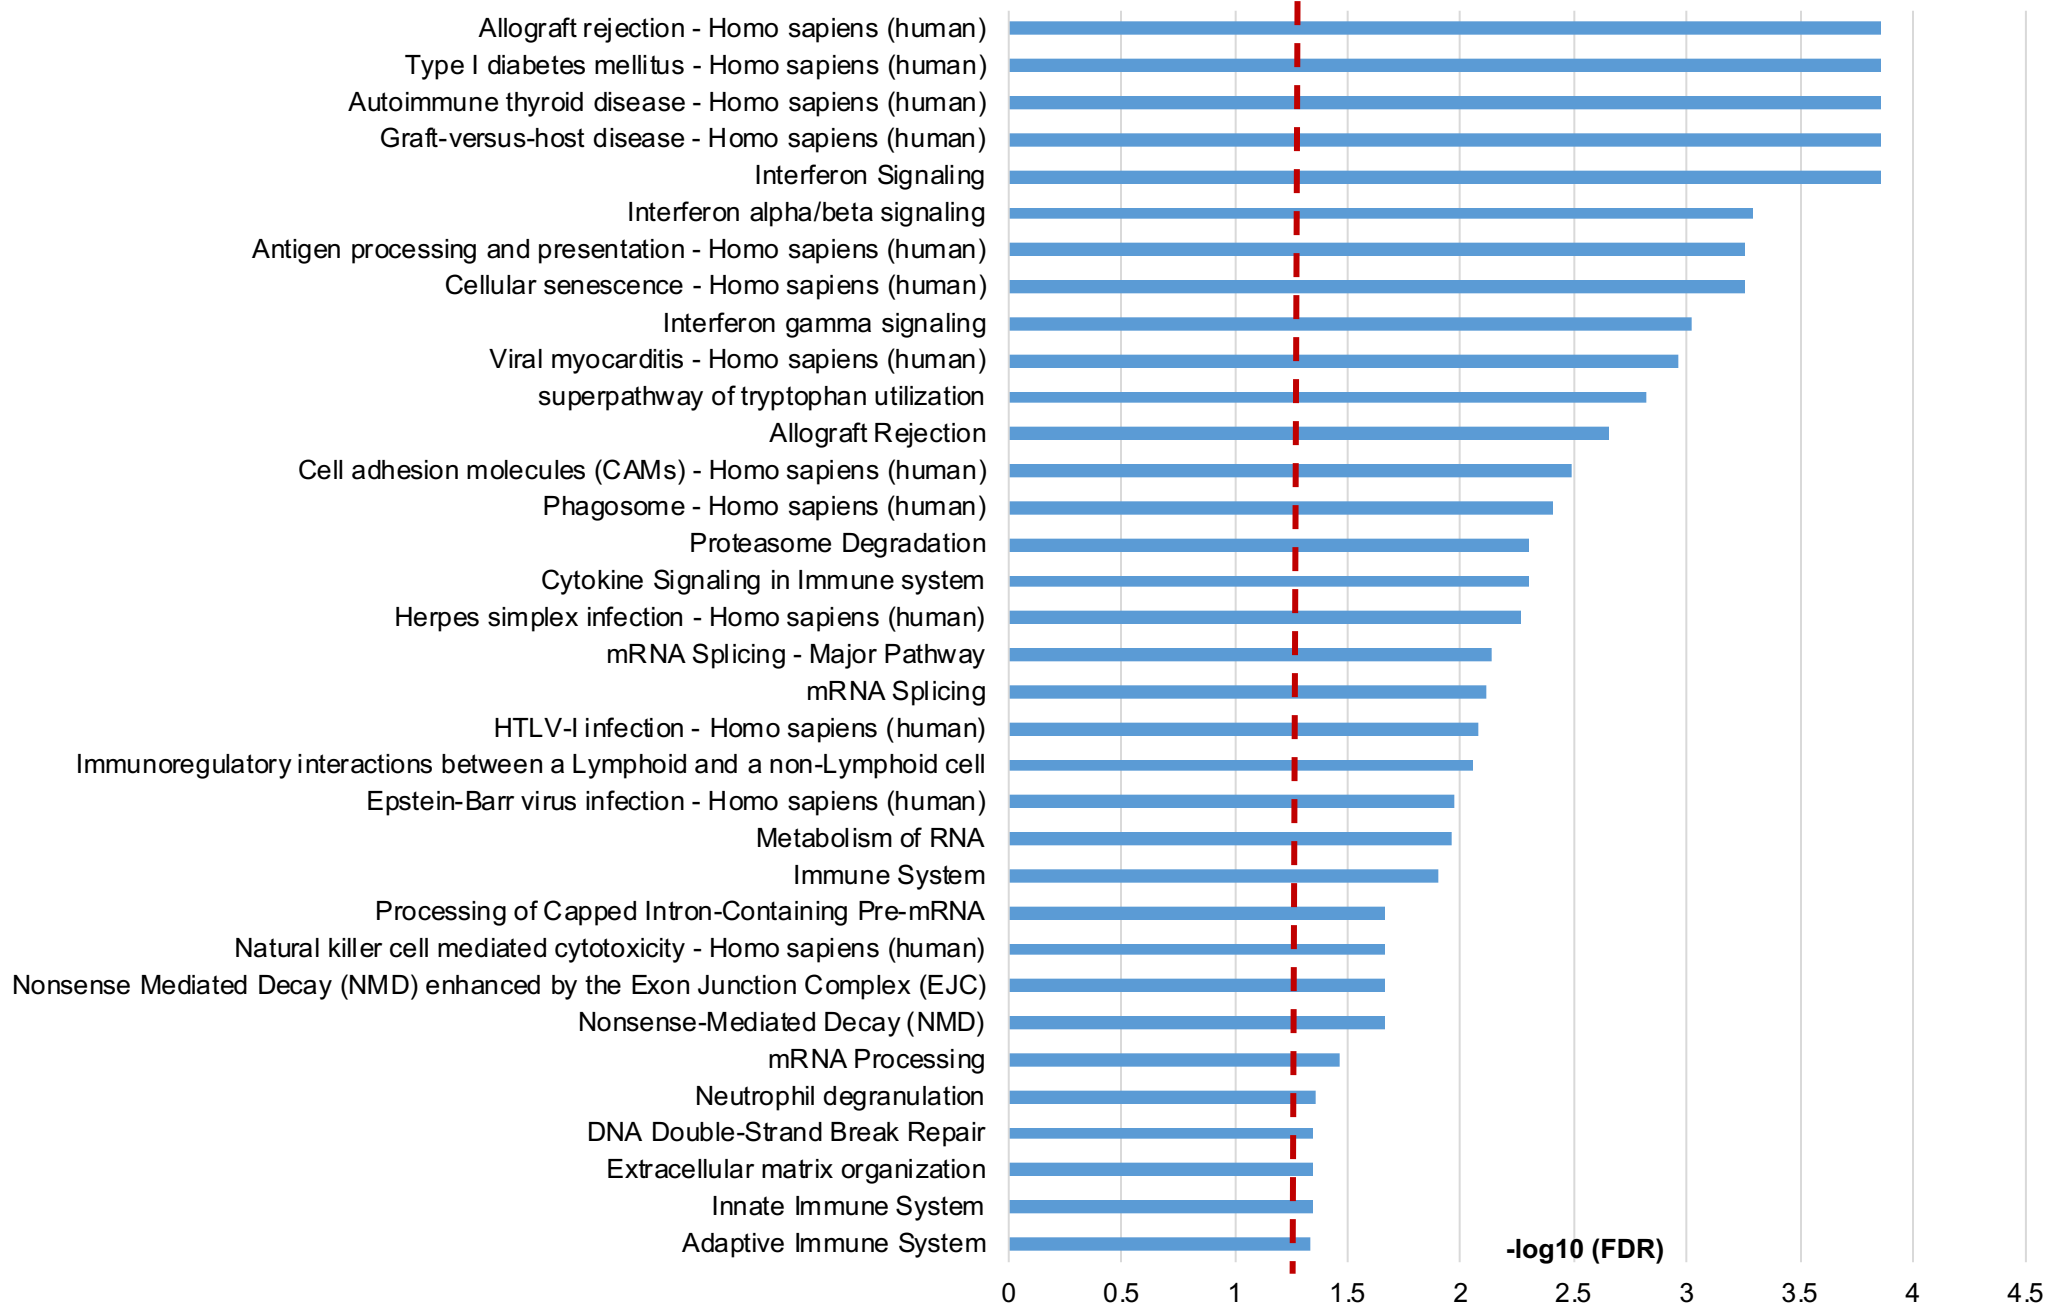

**Figure S2.** Canonical pathways enriched in 143 alternatively spliced genes. Red line indicates the cutoff FDR value,  $q < 0.05$ .

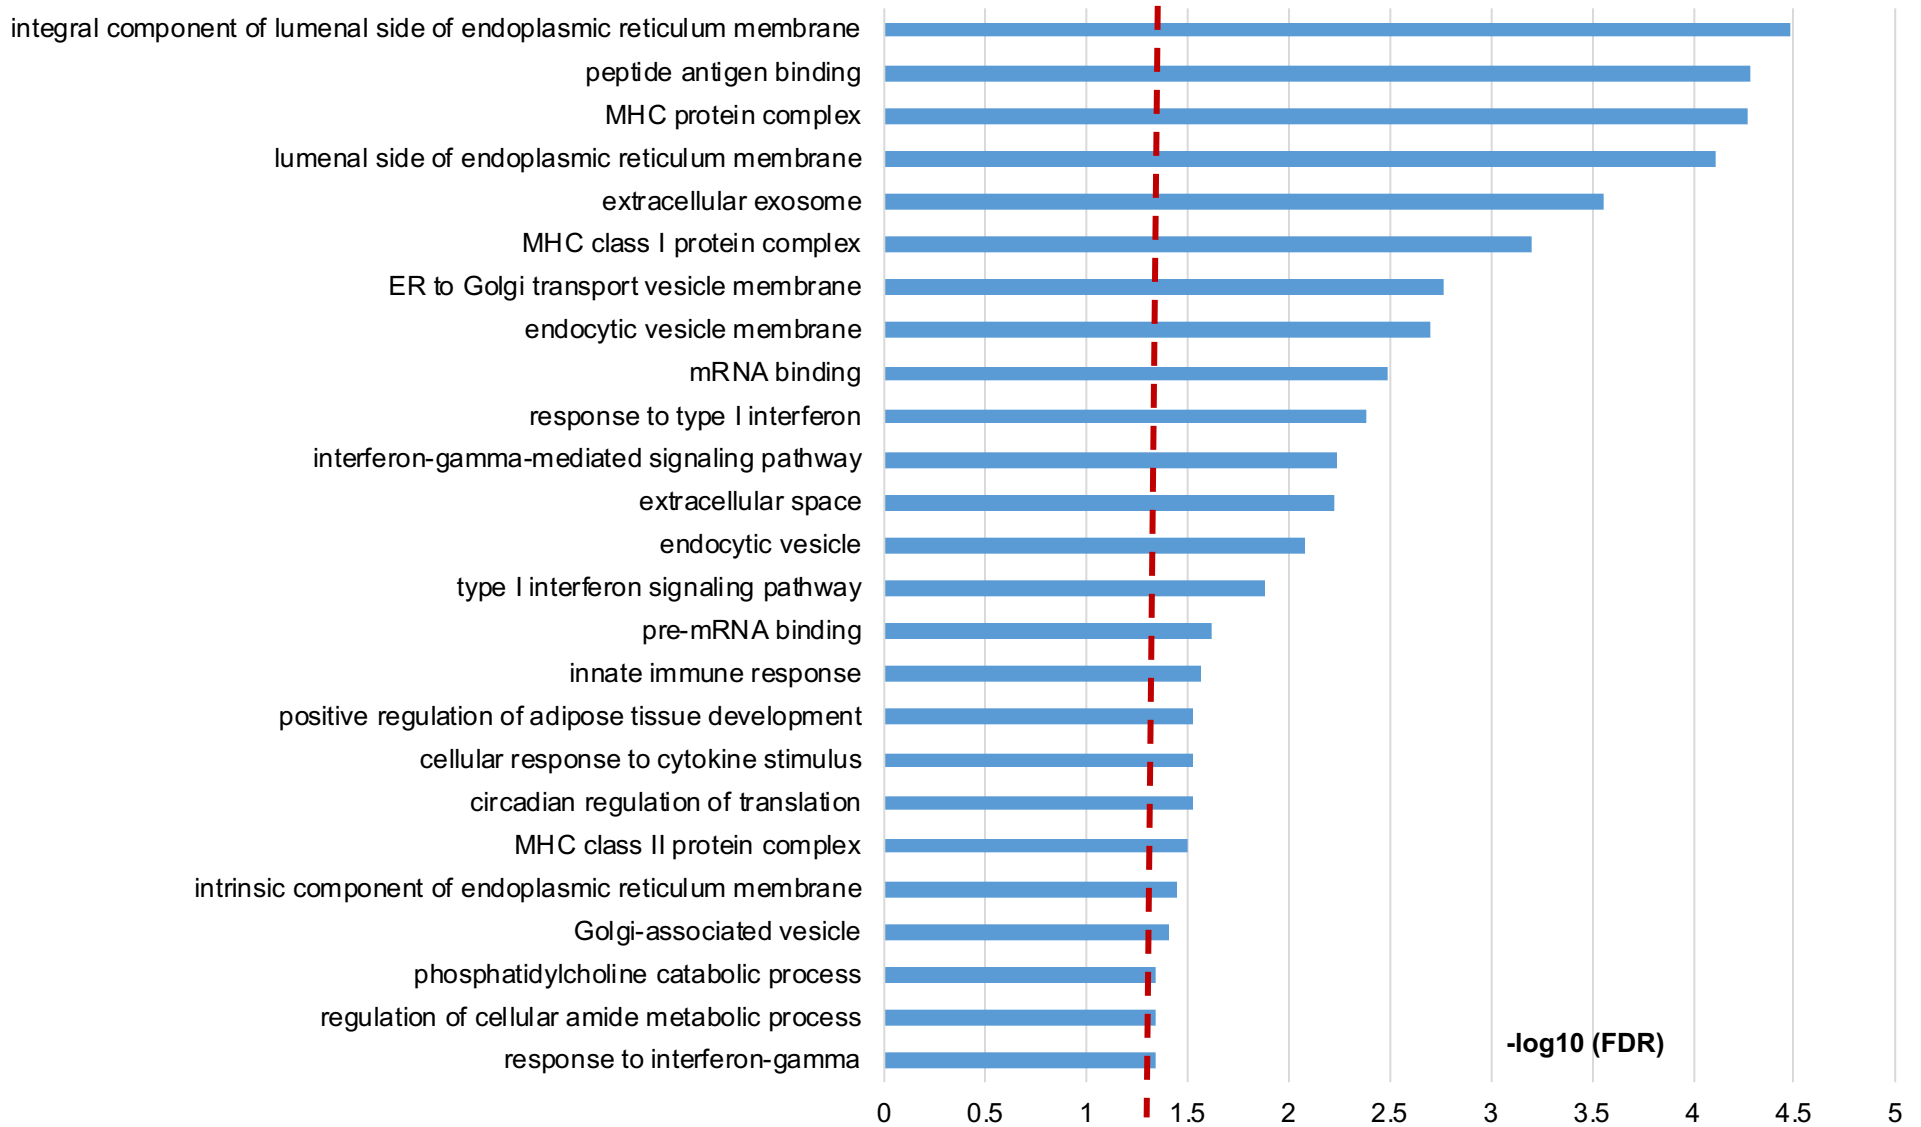

**Figure S3.** GO terms enriched in 143 alternatively spliced genes. GO Cellular Component (CC), Biological Process (BP), and Molecular Function (MF) terms were considered significant at  $q < 0.05$  (red line). Potential false positive GO terms were filtered. GO, gene ontology.

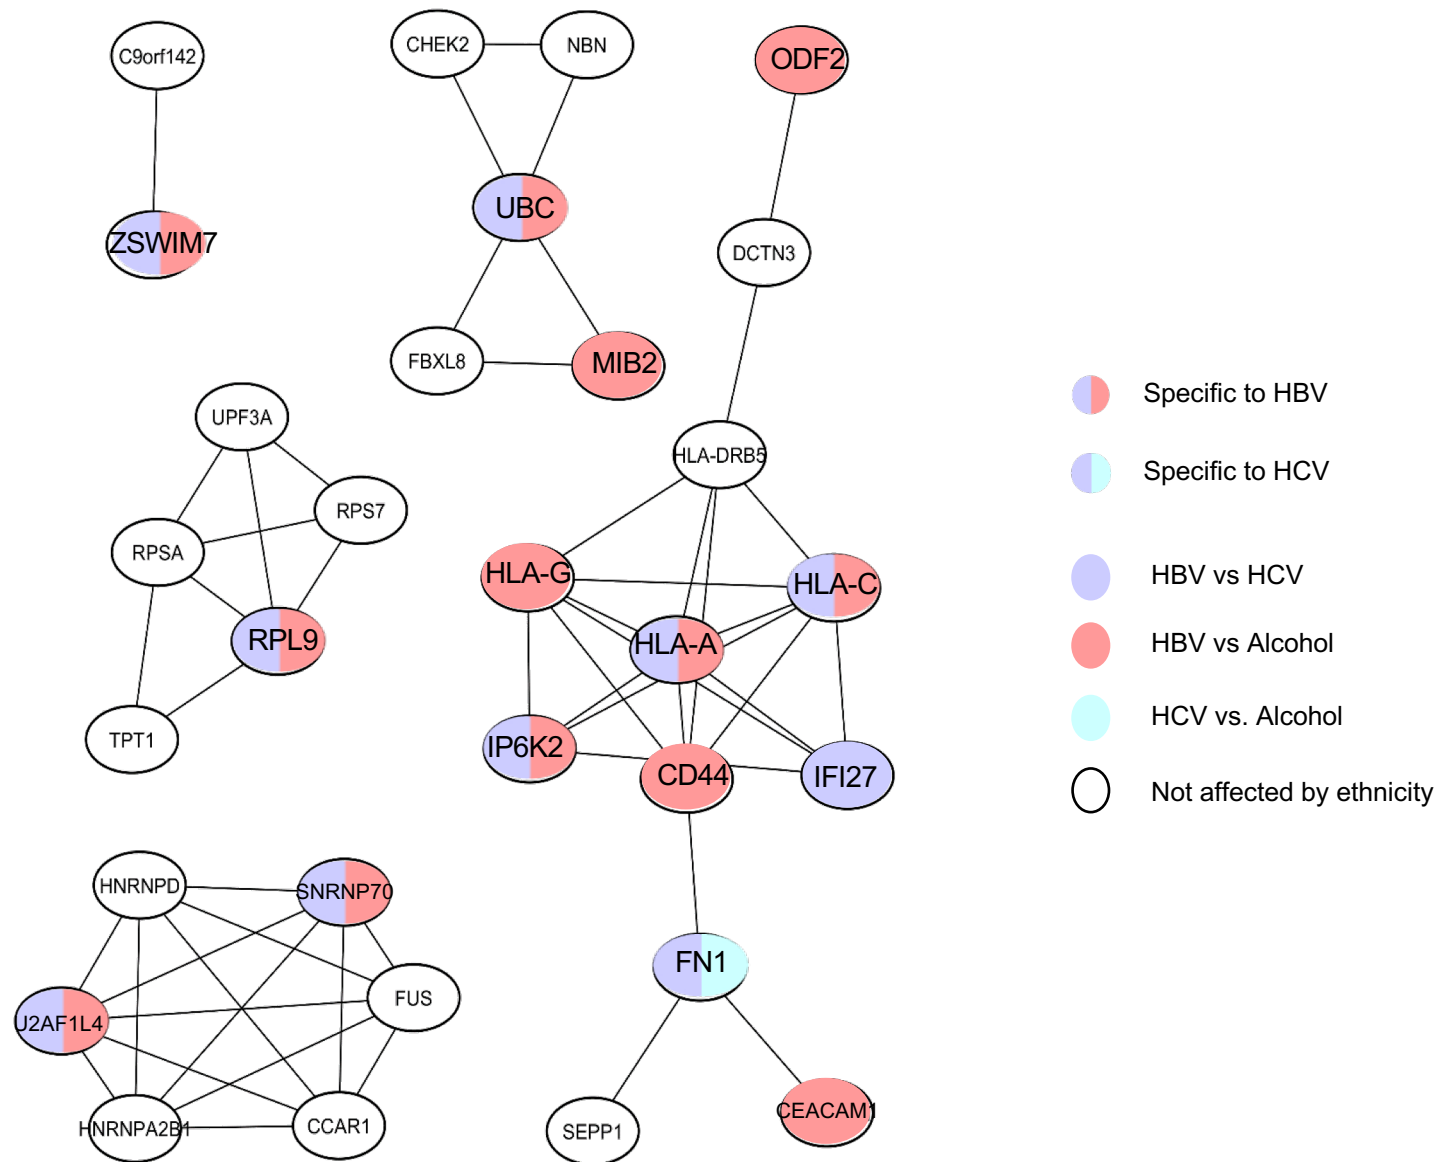

**Figure S4.** PPI not affected by ethnic differences. Protein-protein interaction (PPI) network analysis was conducted for 198 genes (FDR <0.05,  $\Delta$ PSI >0.05) differentially associated with AS events in Caucasians and Asians. Of the 30 networked genes from the three etiology group comparisons (Figure 3), 15 genes (colored) were affected by ethnic differences and 15 genes (non-colored) were not affected by ethnicity.

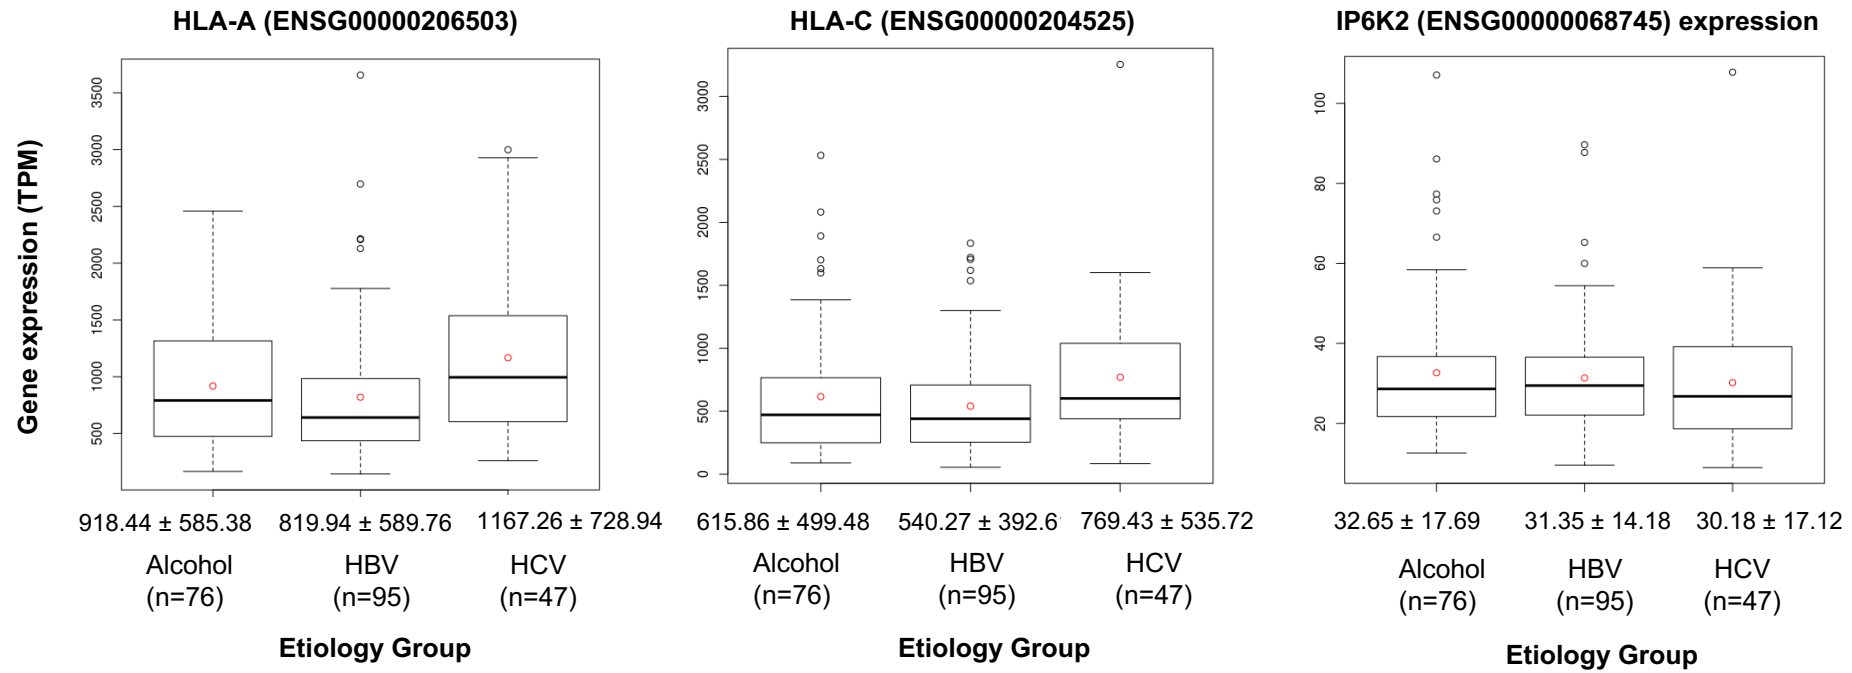

**Figure S5.** Boxplots for distributions of gene expression among three etiologic groups for our three case studies.

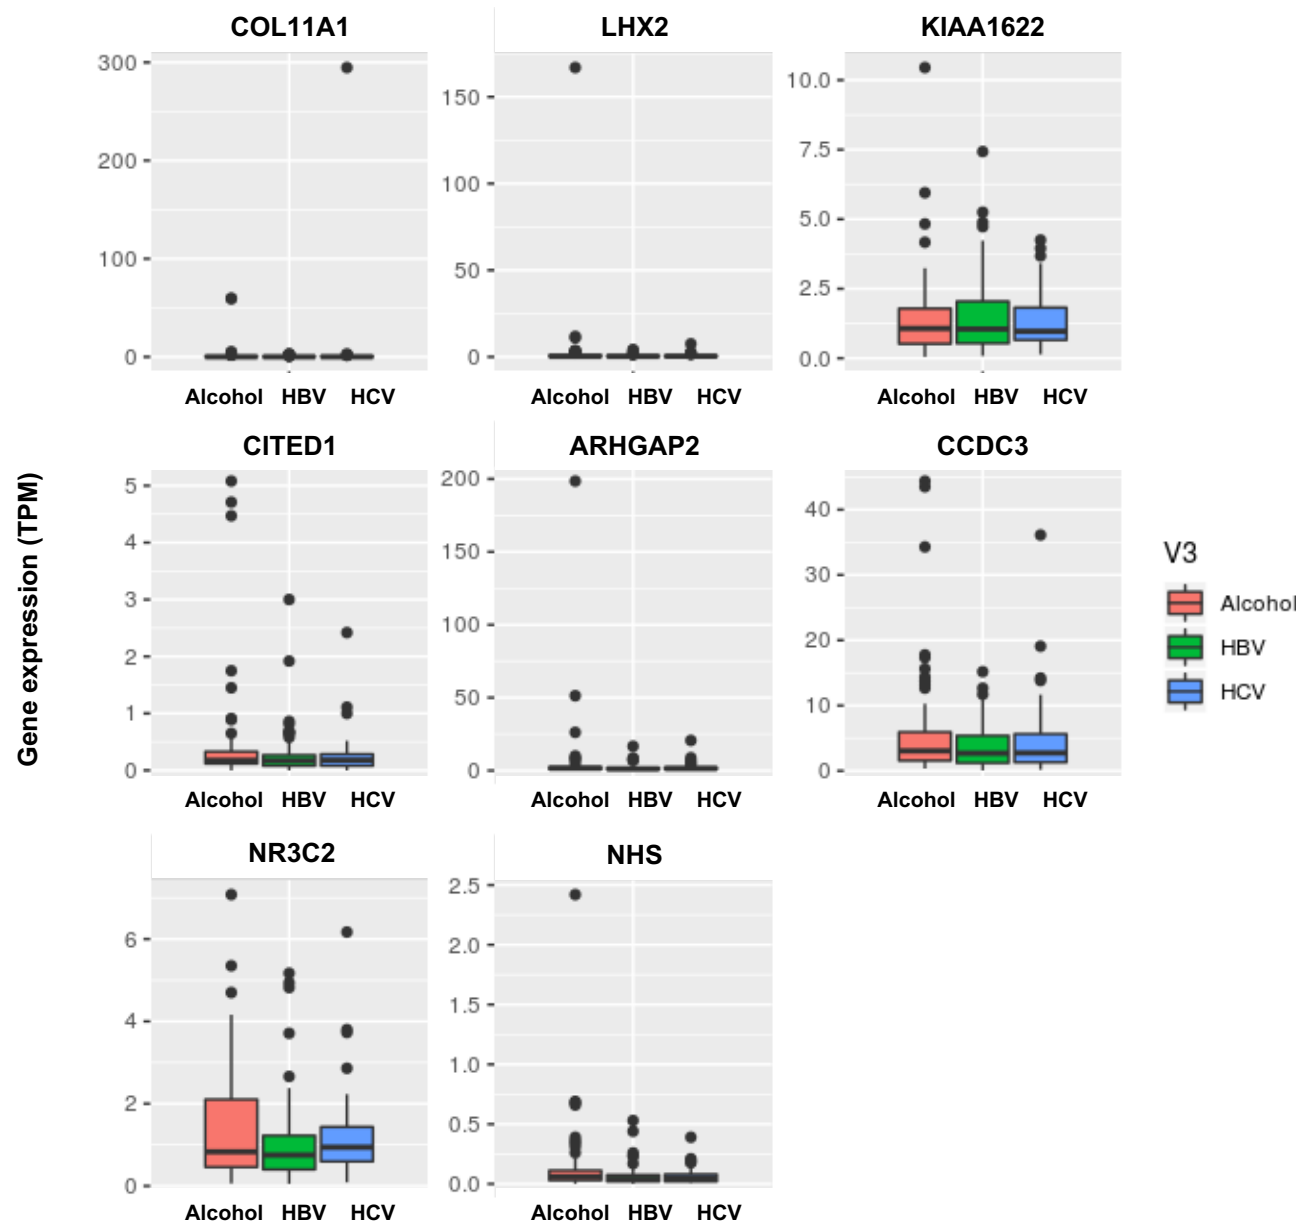

**Figure S6.** Boxplots for distributions of gene expression among three etiologic groups. All of eight genes are reported to be affected by *UPF3A* via NMD process.



**Table S1. Baseline clinical characteristics of study subjects.**

| Variables (n=218)                   | Groups                                   |                            |                                           | p-value*           |
|-------------------------------------|------------------------------------------|----------------------------|-------------------------------------------|--------------------|
|                                     | HBV group<br>(n= 95, 43.6%)              | HCV group<br>(n=47, 21.1%) | Alcohol group<br>(n=76, 34.9%)            |                    |
| Age (year) <sup>§</sup>             | 54±12 <sup>a</sup>                       | 61±9 <sup>b</sup>          | 64±11 <sup>b</sup>                        | <0.05              |
| Gender (male), n (%)                | 78 (82.1)                                | 38 (80.9)                  | 64 (84.2)                                 | 0.92               |
| Race, n (%)                         |                                          |                            |                                           | <0.05 <sup>†</sup> |
| Caucasian                           | 7 (7.4)                                  | 30 (63.8)                  | 48 (63.2)                                 |                    |
| Asian                               | 84 (88.4)                                | 6 (12.8)                   | 24 (31.6)                                 |                    |
| Others                              | 4 (4.2)                                  | 11 (23.4)                  | 4 (5.3)                                   |                    |
| Albumin (g/dL) <sup>p</sup>         | 3.8±1.0                                  | 3.4±1.1                    | 3.9±0.9                                   | 0.08               |
| Total bilirubin(mg/dL) <sup>q</sup> | 0.8±0.5                                  | 0.9±0.7                    | 0.9±1.2                                   | 0.70               |
| PT, INR <sup>r</sup>                | 1.0±0.1                                  | 1.1±0.1                    | 1.1±10.1                                  | 0.35               |
| CTP class, A/B, n (%) <sup>s</sup>  | 87/5 (94.6/5.4)                          | 30/5 (85.7/14.3)           | 24/2 (92.3/7.7)                           | 0.25               |
| AFP (ng/ml) <sup>m</sup>            | 7,4x10 <sup>3</sup> ±2.9x10 <sup>4</sup> | 552±2.1x10 <sup>3</sup>    | 1.1x10 <sup>4</sup> ±3.9 x10 <sup>4</sup> | 0.11               |
| LC, presence, n (%) <sup>†</sup>    | 2 (2.1)                                  | 10 (21.3)                  | 32 (42.1)                                 | <0.05 <sup>†</sup> |
| AJCC (7th) <sup>n</sup>             |                                          |                            |                                           | <0.05 <sup>†</sup> |
| I                                   | 63 (67.7)                                | 26 (60.5)                  | 26 (39.4)                                 |                    |
| II                                  | 19 (20.4)                                | 11 (25.6)                  | 15 (22.7)                                 |                    |
| III (A,B, or C)                     | 9 (9.7)                                  | 6 (14.0)                   | 25 (37.9)                                 |                    |
| IV (A or B)                         | 2 (2.2)                                  | 0 (0)                      | 0 (0)                                     |                    |

**Abbreviation:** AFP, Alpha-fetoprotein; HBV, hepatitis B virus; HCV, hepatitis C virus; PT, prothrombin time; CTP, Child-Turcotte-Pugh, LC, liver cirrhosis; AJCC,

<sup>†</sup>, pathologically defined based on Ishak fibrosis score system

Data for p, q, r, s, m, and n were available for 182,182,177, 138, 176, and 202 patients, respectively.

<sup>§</sup>, mean±standard deviation

\*. P values were calculated using the ANOVA test (using post hoc Tukey's b test), the *Chi*-square test, or Fisher's exact test, as appropriate.

<sup>†</sup>. Fisher's exact test

**Table S2. Identification of alternative splice events in the three pairwise comparisons of HBV vs. HCV, HCV vs. alcohol, and HBV vs. alcohol.**

| Count of events \ Group               | Comparison between groups (FDR <0.05, PSI > 0.05) |                 |                 |
|---------------------------------------|---------------------------------------------------|-----------------|-----------------|
|                                       | HBV vs. HCV                                       | HBV vs. Alcohol | HCV vs. Alcohol |
| Skipped Exon                          | 48                                                | 31              | 16              |
| Retained Intron                       | 14                                                | 15              | 3               |
| Mutually exclusive exon               | 55                                                | 39              | 7               |
| Alternative 3' site                   | 7                                                 | 2               | 2               |
| Alternative 5' site                   | 9                                                 | 6               | 1               |
| Total AS events                       | 133                                               | 93              | 29              |
| Genes associated with total AS events | 89                                                | 69              | 23              |

**Abbreviations:** AS, Alternative Splicing; FDR, false discovery rate; PSI, percent spliced in; HBV,

| Count of events \ Group               | Comparison between groups (FDR <0.05, PSI > 0.1) |                 |                 |
|---------------------------------------|--------------------------------------------------|-----------------|-----------------|
|                                       | HBV vs. HCV                                      | HBV vs. Alcohol | HCV vs. Alcohol |
| Skipped Exon                          | 16                                               | 8               | 2               |
| Retained Intron                       | 4                                                | 2               | 1               |
| Mutually exclusive exon               | 4                                                | 3               | 1               |
| Alternative 3' site                   | 2                                                | 0               | 1               |
| Alternative 5' site                   | 3                                                | 2               | 0               |
| Total AS events                       | 29                                               | 15              | 5               |
| Genes associated with total AS events | 22                                               | 11              | 5               |

hepatitis B virus; HCV, hepatitis C virus.

Detail result of significantly identified AS exons. Compared between each etiology group (i.e. HBV vs HCV, HCV vs Alcohol, and Alcohol vs HBV). Five different alternative splicing type (ES: Exon skipping, IR: Intron retention, A3SS: alternative 3' splice site, A5SS: Alternative 5' Splice site, and MXE: Mutually exclusive exon) was calculated in each group comparisons. Splicing events with lower than 10% PSI difference between two groups and FDR value was larger than 0.05 was excluded. In addition, to obtain larger gene sets for the further analysis, splicing events lower than 5% PSI difference between two groups and FDR-value was larger than 0.05 was excluded.

**Table S3. The demographic summary of Caucasian and Asian population.**

| Variables (n=199)                | Race                                     |                                          | p-value* |
|----------------------------------|------------------------------------------|------------------------------------------|----------|
|                                  | Caucasian<br>(n= 85, 43.6%)              | Asian<br>(n=114, 21.1%)                  |          |
| Age (year) <sup>§</sup>          | 65±11                                    | 56±10                                    | <0.01    |
| Gender (male), n (%)             | 64 (75.3)                                | 99 (86.8)                                | 0.04     |
| Etiology                         |                                          |                                          | <0.01    |
| HBV                              | 7 (8.2)                                  | 84 (73.7)                                |          |
| HCV                              | 30 (35.3)                                | 6 (15.3)                                 |          |
| Alcohol                          | 48 (56.5)                                | 24 (21.1)                                |          |
| AFP                              | 1,0x10 <sup>4</sup> ±3.7x10 <sup>4</sup> | 4.9x10 <sup>3</sup> ±2.4x10 <sup>4</sup> | 0.28     |
| LC, presence, n (%) <sup>†</sup> | 17 (20.0)                                | 21 (18.4)                                | 0.86     |

**Abbreviation:** AFP, Alpha-fetoprotein; HBV, hepatitis B virus; HCV, hepatitis C virus; LC, liver cirrhosis

<sup>†</sup>, pathologically defined based on Ishak fibrosis score system

<sup>§</sup>, mean±standard deviation

\*: P values were calculated using the student *t*-test or the *Chi*-square test.

**Table S4. Identification of alternative splice events in comparison of Caucasian and Asian population.**

| Count of events                       | Group comparisons                             |                                                |
|---------------------------------------|-----------------------------------------------|------------------------------------------------|
|                                       | Caucasian vs. Asian<br>(FDR <0.05, PSI > 0.1) | Caucasian vs. Asian<br>(FDR <0.05, PSI > 0.05) |
| Skipped Exon                          | 19                                            | 73                                             |
| Retained Intron                       | 5                                             | 29                                             |
| Mutually exclusive exon               | 7                                             | 238                                            |
| Alternative 3' site                   | 0                                             | 13                                             |
| Alternative 5' site                   | 2                                             | 10                                             |
| Total AS events                       | 33                                            | 363                                            |
| Genes associated with total AS events | 25                                            | 198                                            |

**Abbreviations:** AS, Alternative Splicing; FDR, false discovery rate; PSI, percent spliced in.

Five different alternative splicing type (ES: Exon skipping, IR: Intron retention, A3SS: alternative 3' splice site, A5SS: Alternative 5' Splice site, and MXE: Mutually exclusive exon) was calculated in race group. To obtain larger gene sets for the further analysis, splicing events lower than 5% PSI difference between two groups was excluded.

**Table S5. List of frequently altered genes by etiology**

| (FDR < 0.05, ΔPSI>0.05) |               |               |                   |
|-------------------------|---------------|---------------|-------------------|
| Common in all etiology  | Common in HBV | Common in HCV | Common in alcohol |
| CD46                    | DYRK4         | GPALPP1       | APLP2             |
|                         | SMARCC2       | FN1           | INF2              |
|                         | PIGQ          | IL17RC        | C8orf44           |
|                         | PDXDC2P       | CYB5A         |                   |
|                         | ALDH3A2       | HAAO          |                   |
|                         | CIRBP         | RP4-665J23.1  |                   |
|                         | ADAM15        |               |                   |
|                         | S100A13       |               |                   |
|                         | IP6K2         |               |                   |
|                         | C8orf59       |               |                   |
|                         | UBC           |               |                   |
|                         | ZSWIM7        |               |                   |
|                         | U2AF1L4       |               |                   |
|                         | HLA-A         |               |                   |
|                         | HLA-C         |               |                   |
|                         | SLC25A37      |               |                   |
|                         | CPNE1         |               |                   |
|                         | SNRNP70       |               |                   |
|                         | NDUFS5        |               |                   |
|                         | ULK3          |               |                   |
|                         | IL32          |               |                   |
|                         | MST1P2        |               |                   |
|                         | MST1L         |               |                   |
|                         | TRNAU1AP      |               |                   |
|                         | HNRNPD        |               |                   |
|                         | RPL9          |               |                   |
|                         | GTF2I         |               |                   |
| (FDR < 0.05, ΔPSI>0.1)  |               |               |                   |
| Common in all etiology  | Common in HBV | Common in HCV | Common in alcohol |
| NA                      | PIGQ          | CYB5A         | NA                |
|                         | ALDH3A2       | RP4-665J23.1  |                   |
|                         | ADAM15        |               |                   |
|                         | IP6K2         |               |                   |
|                         | HLA-C         |               |                   |
|                         | SLC25A37      |               |                   |
|                         | C8orf59       |               |                   |
|                         |               |               |                   |
